# Supplementary material for: Tetra-arylborate lipophilic anions as targeting groups
Source: Royal Society of Chemistry journal article supplement (doi:10.1039/d0cc07924c), 2021-01-01

Supporting information 2 for

## Tetra-Arylborate Lipophilic Anions as Targeting Groups

Kishore Kumar Gaddale Devanna<sup>1</sup>, Justyna M. Gawel<sup>1</sup>, Tracy A. Prime<sup>2</sup>, Filip Cvetko<sup>2</sup>, Cristiane Benincá<sup>2</sup>, Stuart T. Caldwell<sup>1</sup>, Alexander Negoda<sup>3</sup>, Andrew Harrison<sup>2</sup>, Andrew M. James<sup>2</sup>, Evgeny V. Pavlov<sup>4</sup>, Michael P. Murphy<sup>2,5,\*</sup> and Richard C. Hartley<sup>1,\*</sup>

<sup>1</sup>School of Chemistry, University of Glasgow, Glasgow, G12 8TA, UK.

<sup>2</sup>MRC Mitochondrial Biology Unit, Hills Road, Cambridge CB2 0XY, UK.

<sup>3</sup>Department of Physiology and Biophysics, Dalhousie University, Halifax, Nova Scotia, Canada.

<sup>4</sup>New York University, College of Dentistry, Department of Molecular Pathobiology, 345 East 24th Street, New York, NY 10010, USA

<sup>5</sup>Department of Medicine, University of Cambridge, Cambridge, UK.

\*Correspondence: [Richard.Hartley@glasgow.ac.uk](mailto:Richard.Hartley@glasgow.ac.uk) [mpm@mrc-mbu.cam.ac.uk](mailto:mpm@mrc-mbu.cam.ac.uk)

### Contents of Supplementary Information 2: NMR Spectra of

|                                                                                                     |     |
|-----------------------------------------------------------------------------------------------------|-----|
| <i>Tert</i> -butyl 4-(4'-bromophenylsulfonyl)piperazine-1-carboxylate <b>1</b>                      | S2  |
| Methyl 4-(4'-bromophenylsulfonyl)piperazine-1-carboxylate <b>2</b>                                  | S3  |
| Potassium {4-[4'-(methoxycarbonyl)piperazin-1'-ylsulfonyl]phenyl} trifluoroborate <b>3</b>          | S4  |
| Tetrabutylammonium {4-[4'-(methoxycarbonyl)piperazin-1'-ylsulfonyl]phenyl} triphenylborate <b>4</b> | S6  |
| Tetrabutylammonium [4-(piperazin-1'-ylsulfonyl)phenyl] triphenylborate <b>5</b>                     | S8  |
| TPBE (tetrabutylammonium salt)                                                                      | S10 |
| TPBE (sodium salt)                                                                                  | S12 |
| TPBM (sodium salt)                                                                                  | S14 |
| TPBBODIPY (sodium salt)                                                                             | S15 |
| TPBCoumarin (sodium salt)                                                                           | S17 |

# Tert-butyl 4-(4'-bromophenylsulfonyl)piperazine-1-carboxylate 1

## <sup>1</sup>H NMR spectrum

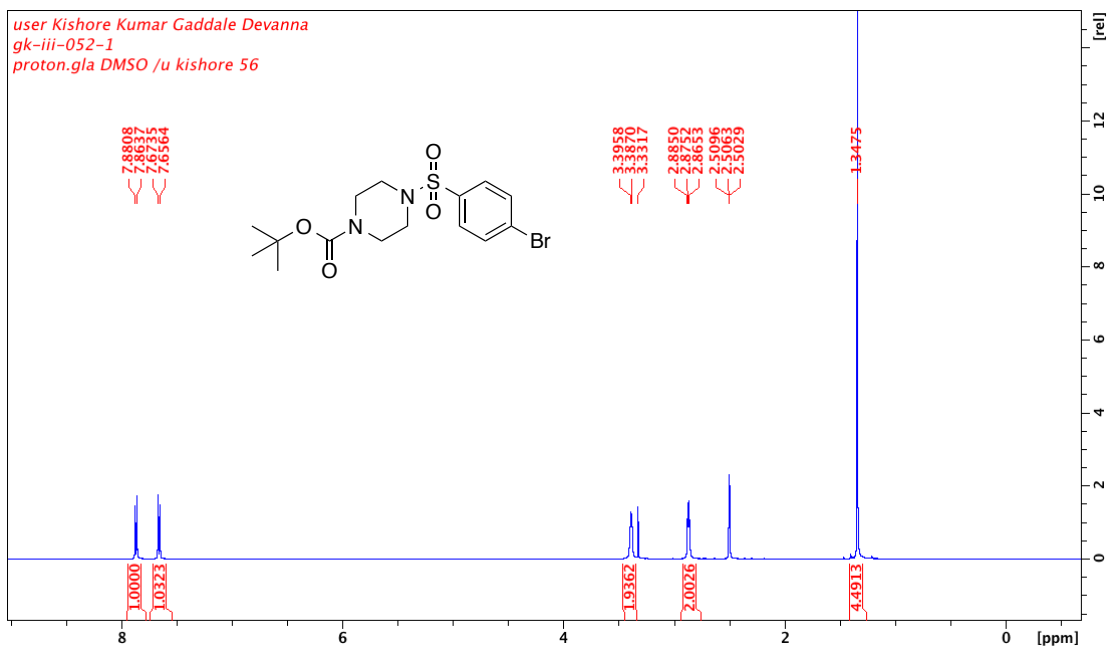

## <sup>13</sup>C NMR spectrum

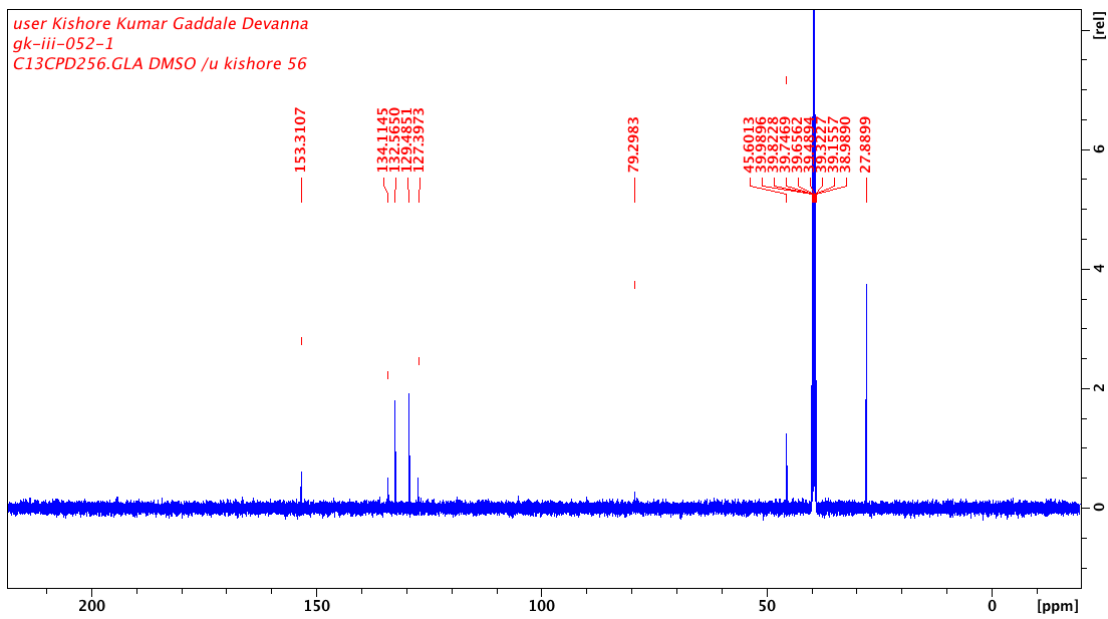

# Methyl 4-(4'-bromophenylsulfonyl)piperazine-1-carboxylate 2

## <sup>1</sup>H NMR spectrum

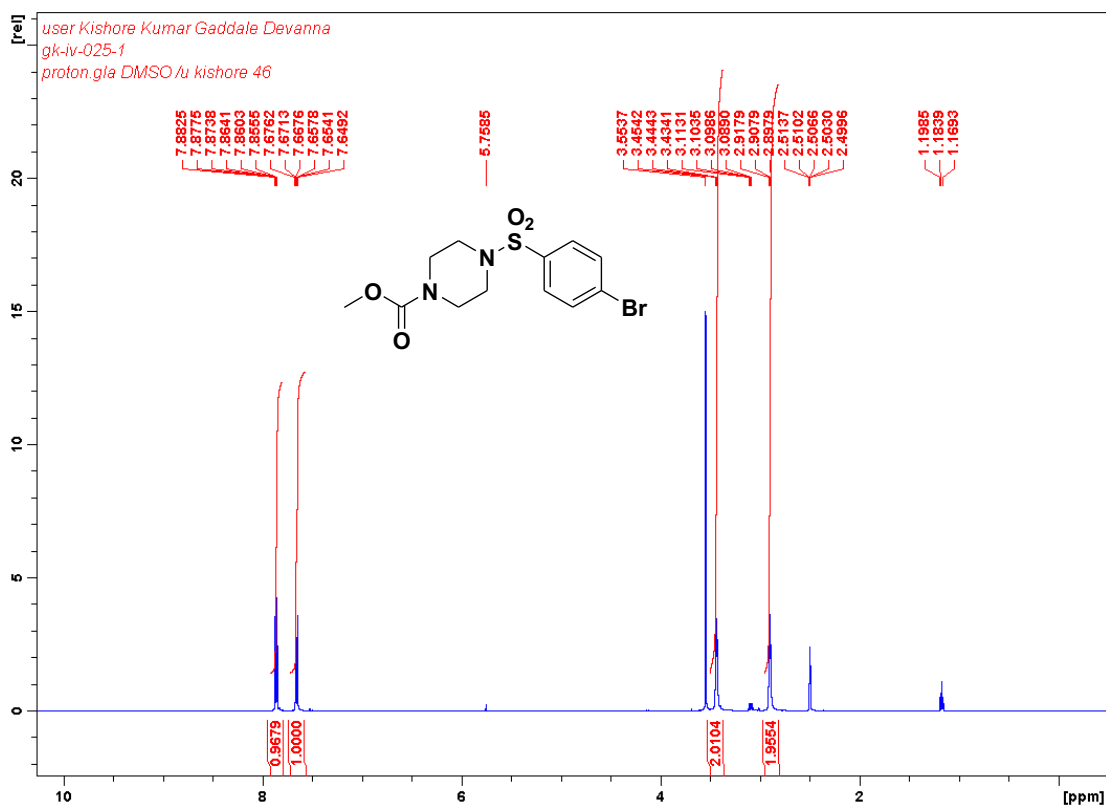

## <sup>13</sup>C NMR spectrum

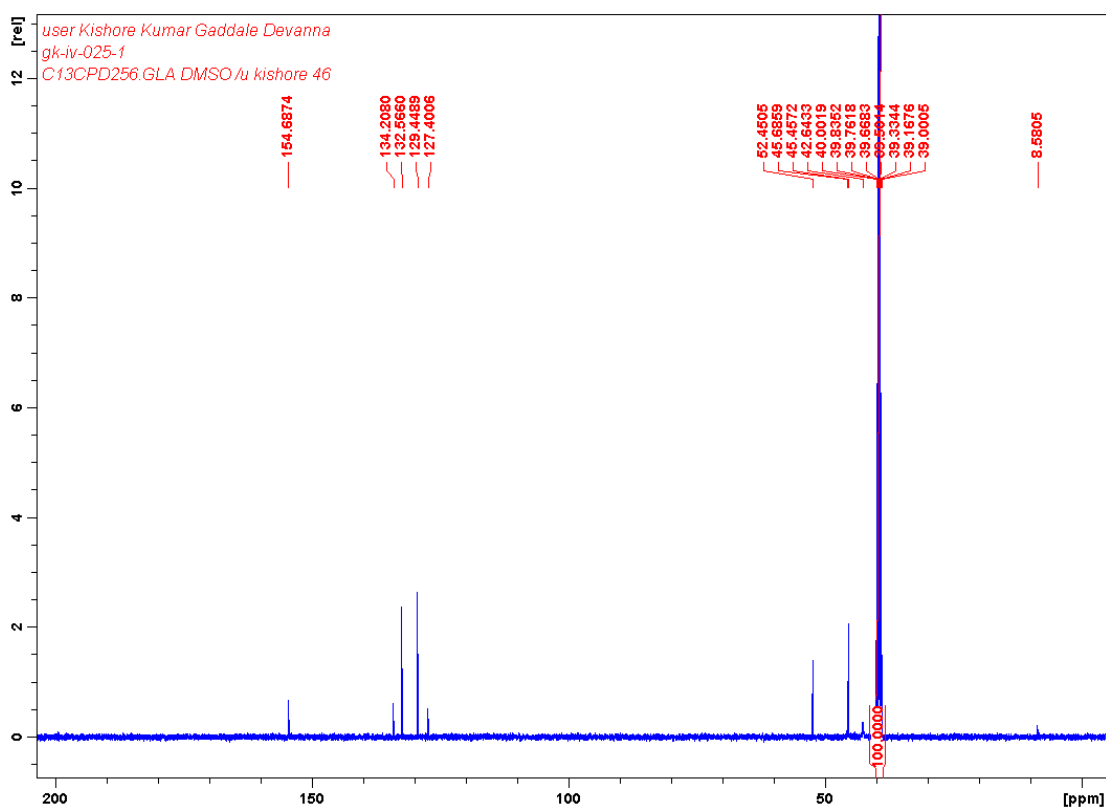

# Potassium {4-[4'-(methoxycarbonyl)piperazin-1'-ylsulfonyl]phenyl}trifluoroborate 3

## <sup>1</sup>H NMR spectrum

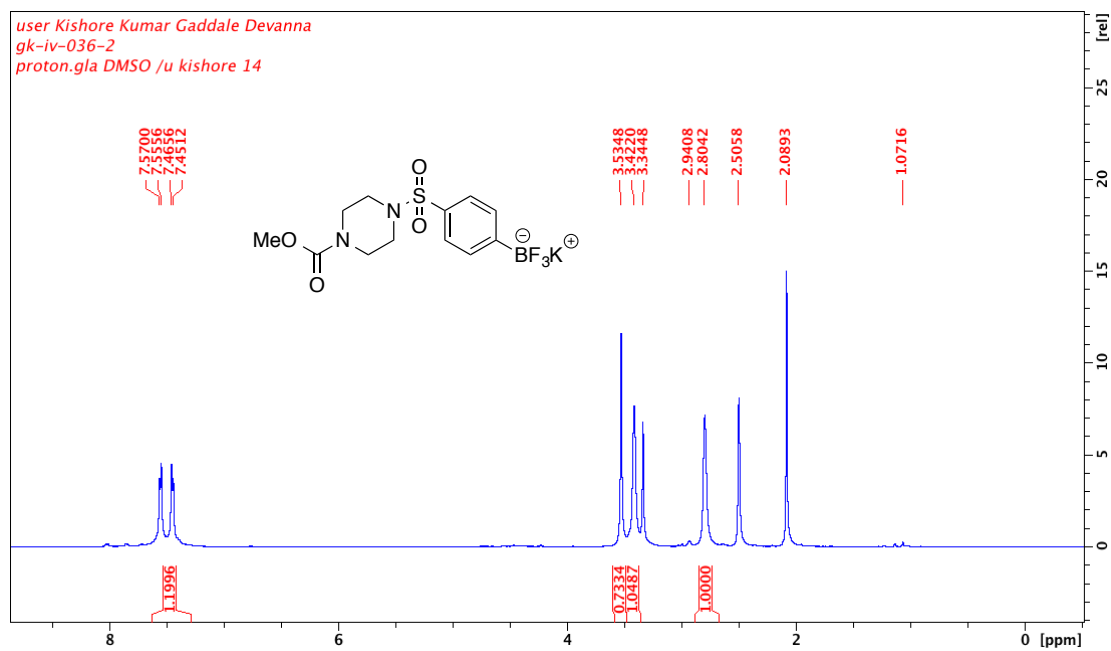

## <sup>13</sup>C NMR spectrum

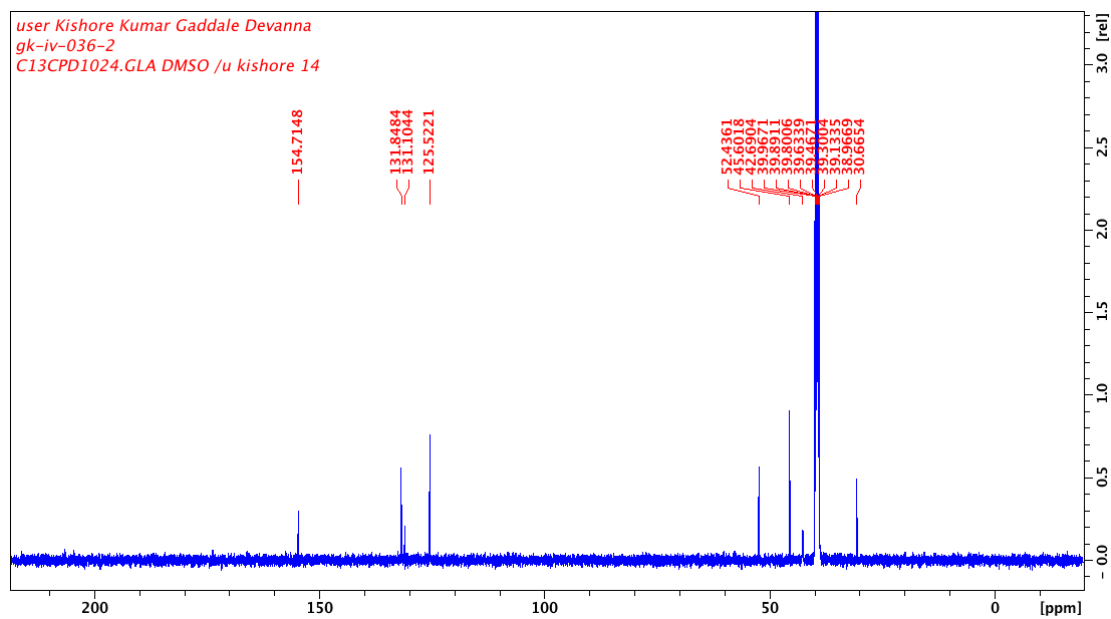

# <sup>19</sup>F NMR spectrum

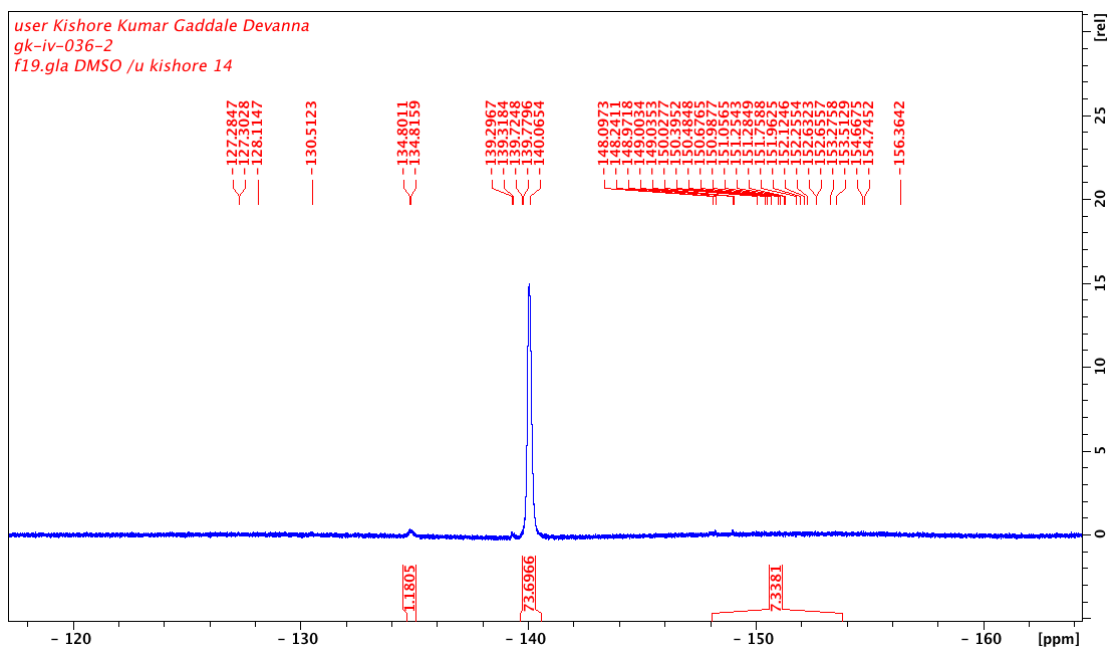

# Tetrabutylammonium

## {4-[4'-(methoxycarbonyl)piperazin-1'-ylsulfonyl]phenyl}triphenylborate 4

### <sup>1</sup>H NMR spectrum

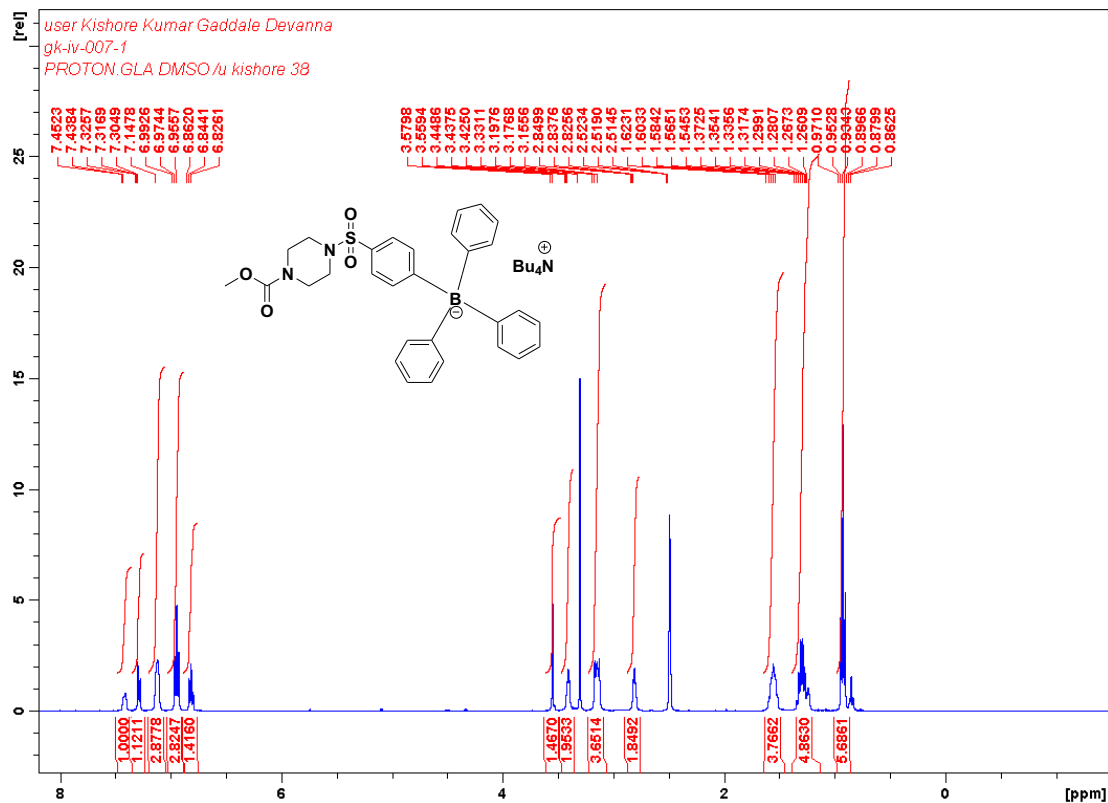

### <sup>13</sup>C NMR spectrum

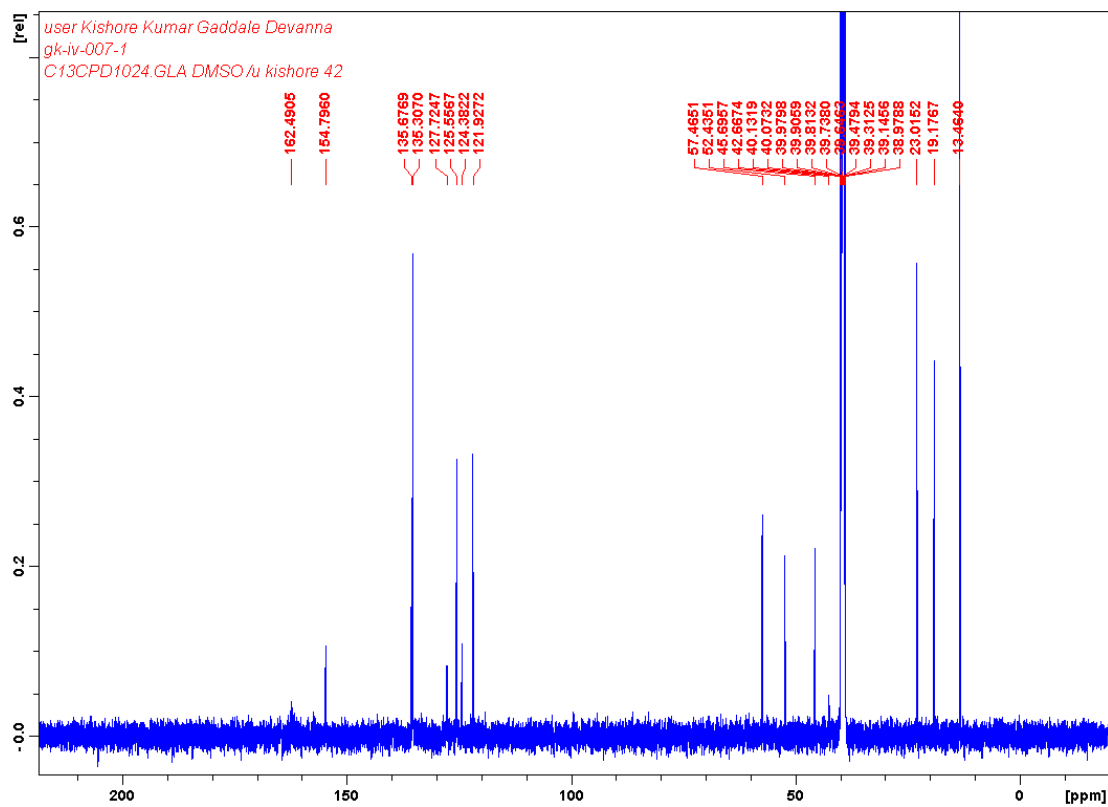

# $^{11}\text{B}$ NMR spectrum

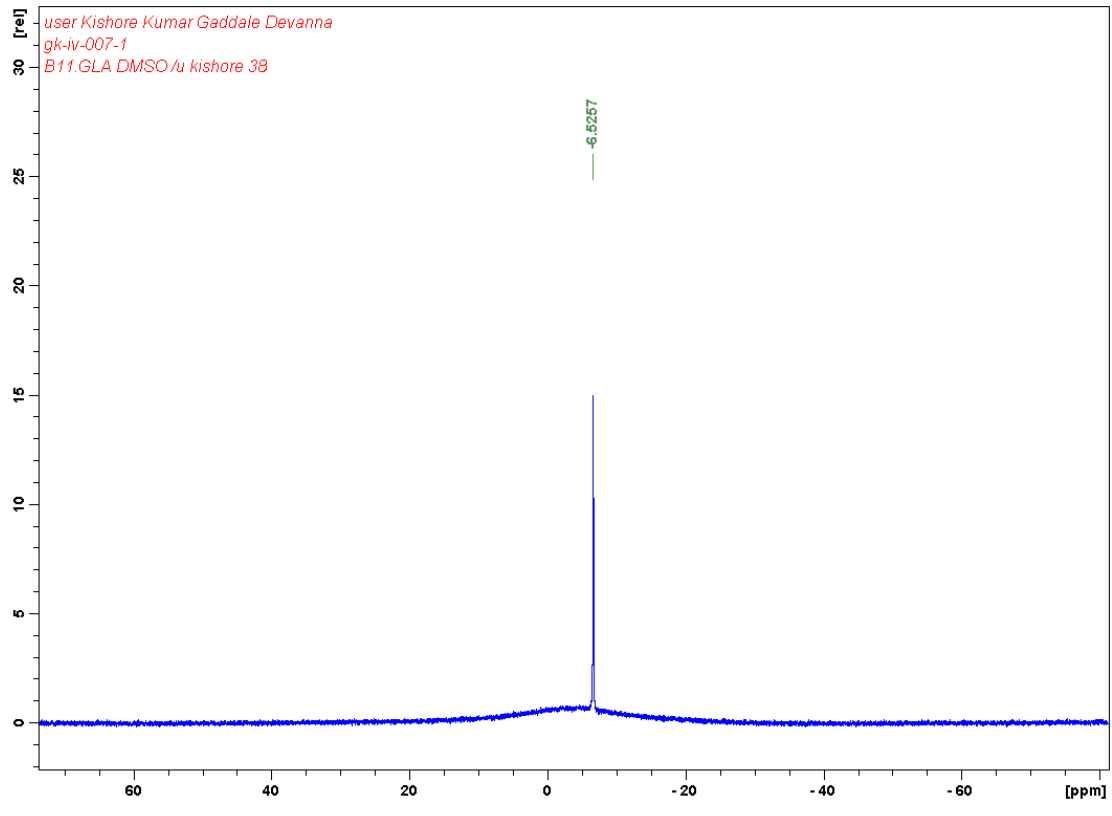

# Tetrabutylammonium [4-(piperazin-1'-ylsulfonyl)phenyl]triphenylborate 5

## <sup>1</sup>H NMR spectrum

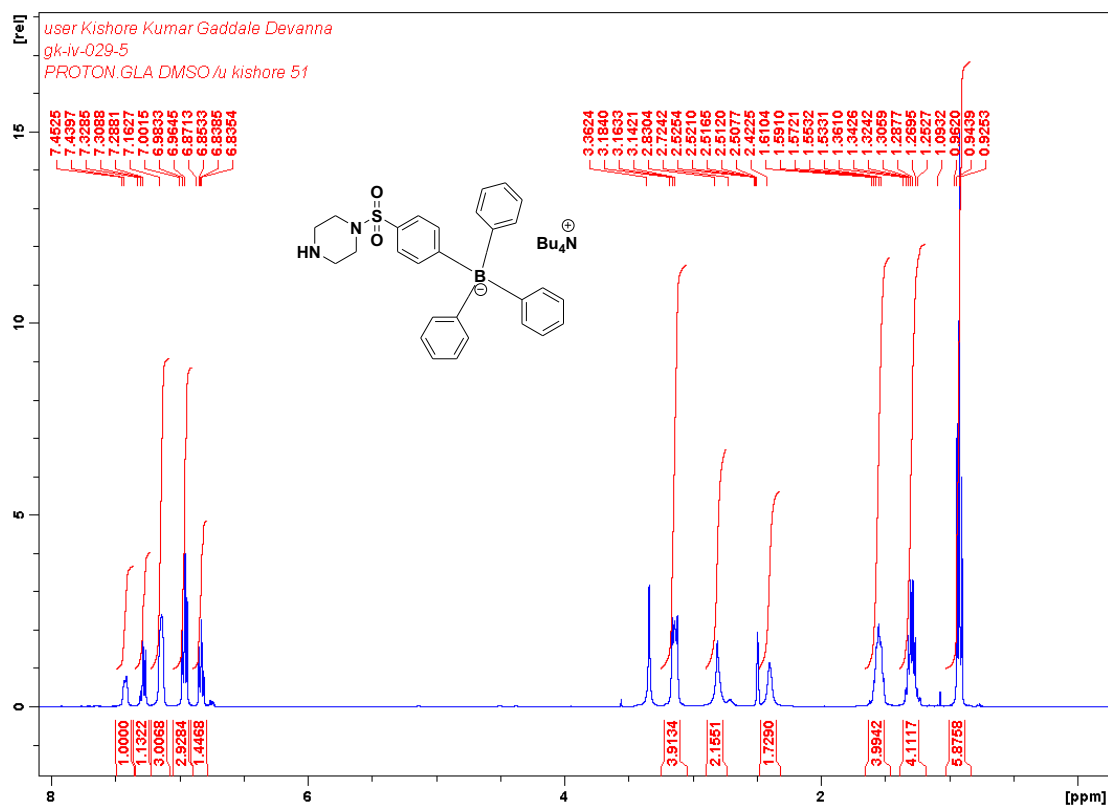

## <sup>13</sup>C NMR spectrum

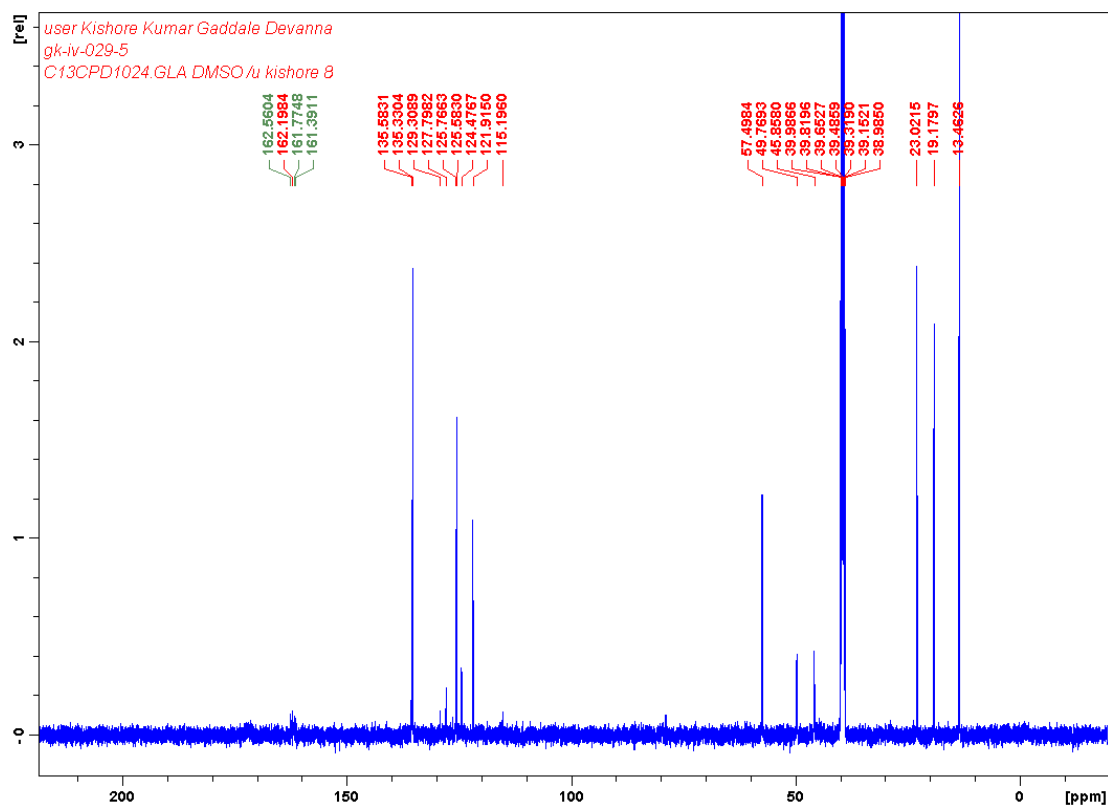



# $^{11}\text{B}$ NMR spectrum

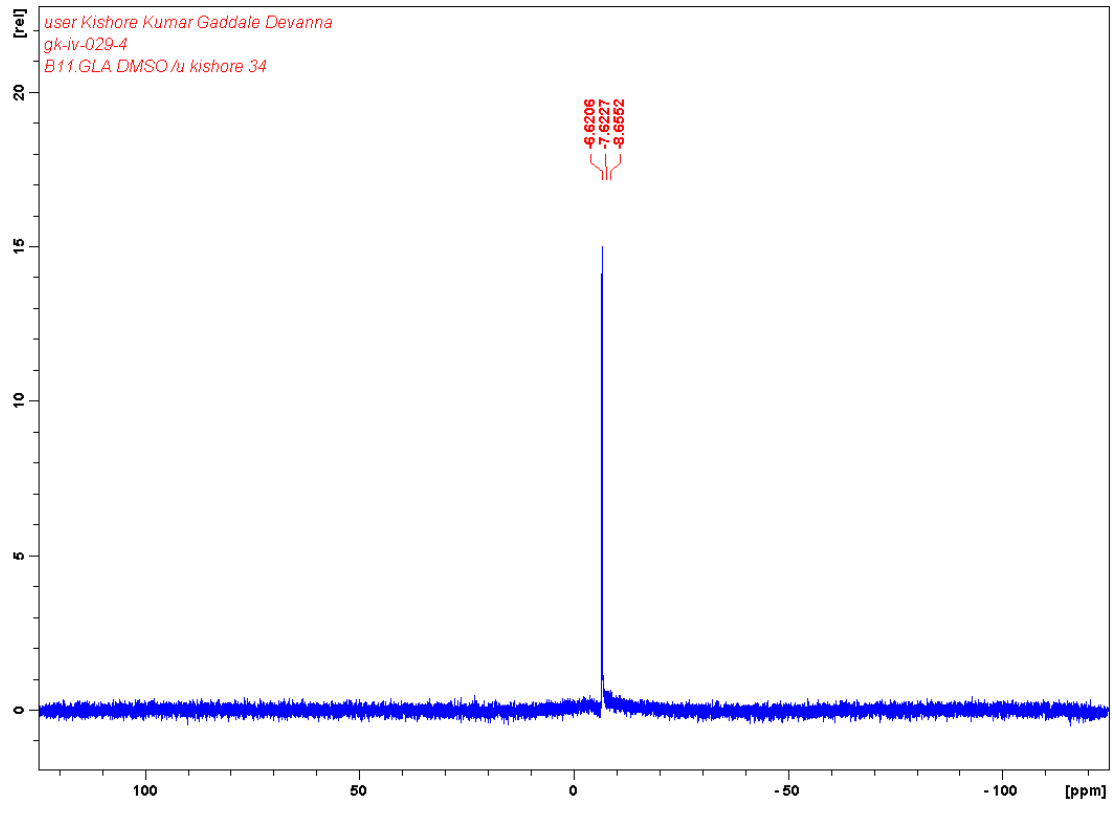

**Tetrabutylammonium (4-{4'-[2''-(6'''-hydroxy-2''',5''',7''',8'''-tetramethylchroman-2''')-yl]acetyl}piperazin-1'-ylsulfonyl}phenyl)triphenylborate, TPBE (tetrabutylammonium salt)**  
**<sup>1</sup>H NMR spectrum**

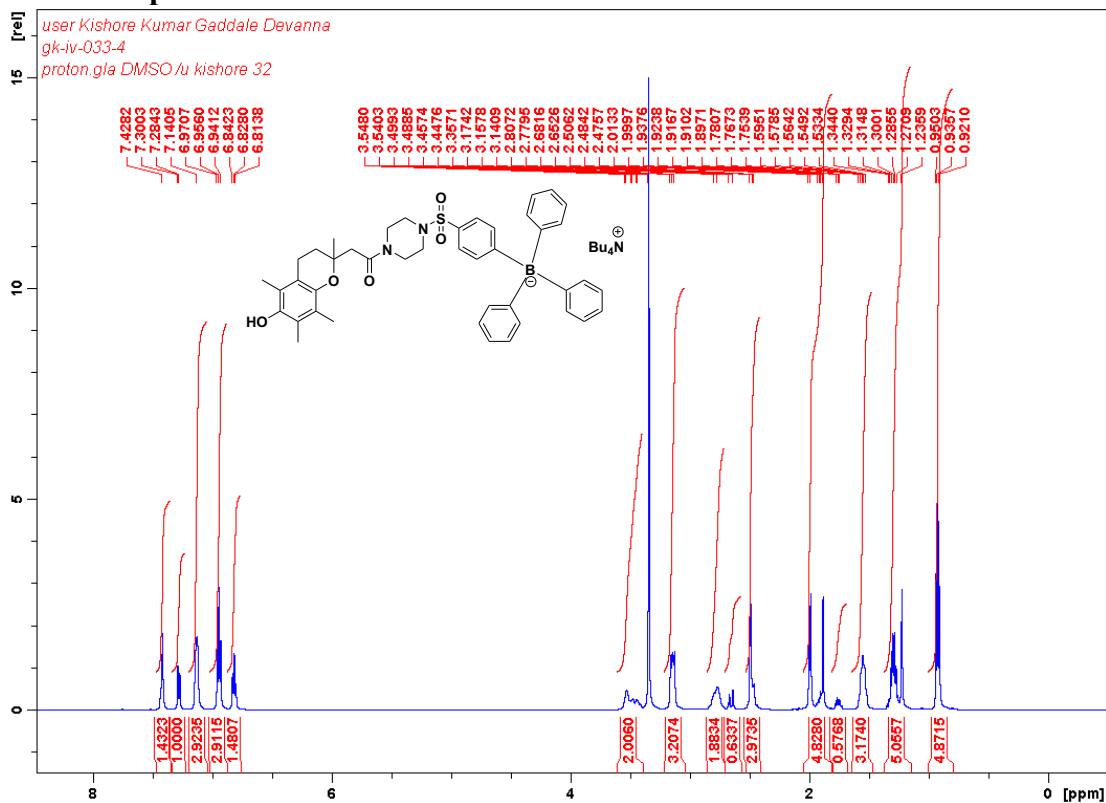

**<sup>13</sup>C NMR spectrum**

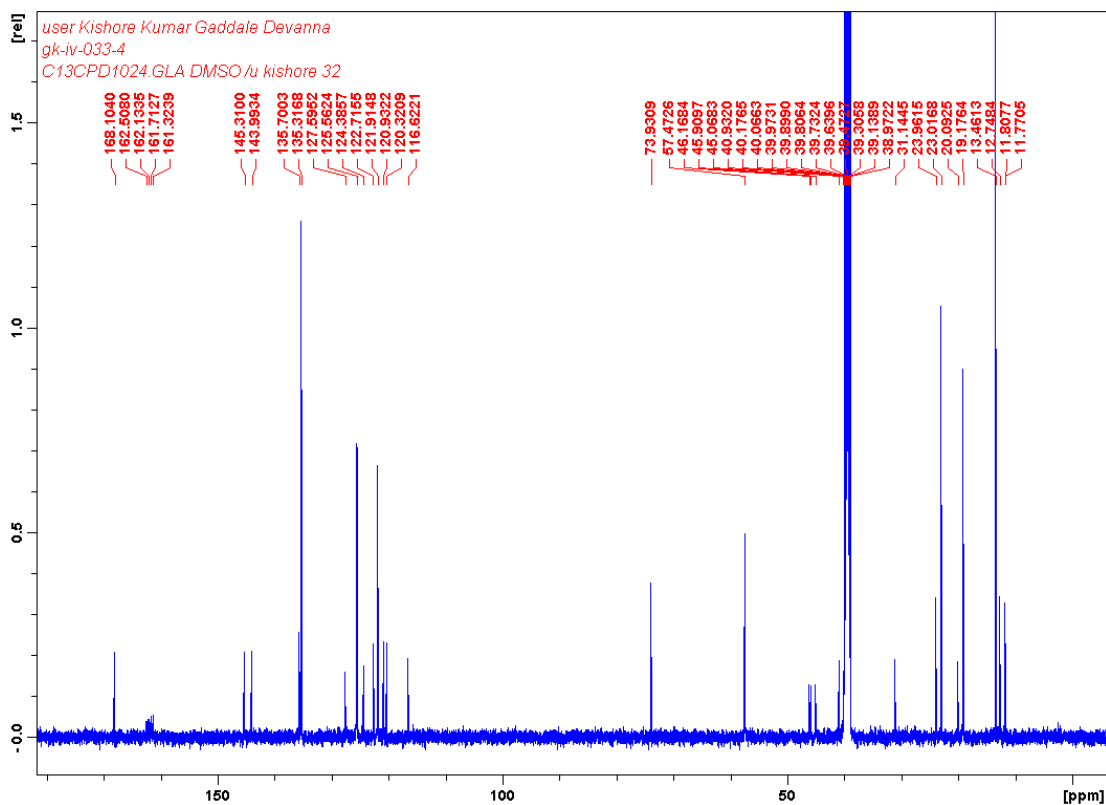

# $^{11}\text{B}$ NMR spectrum

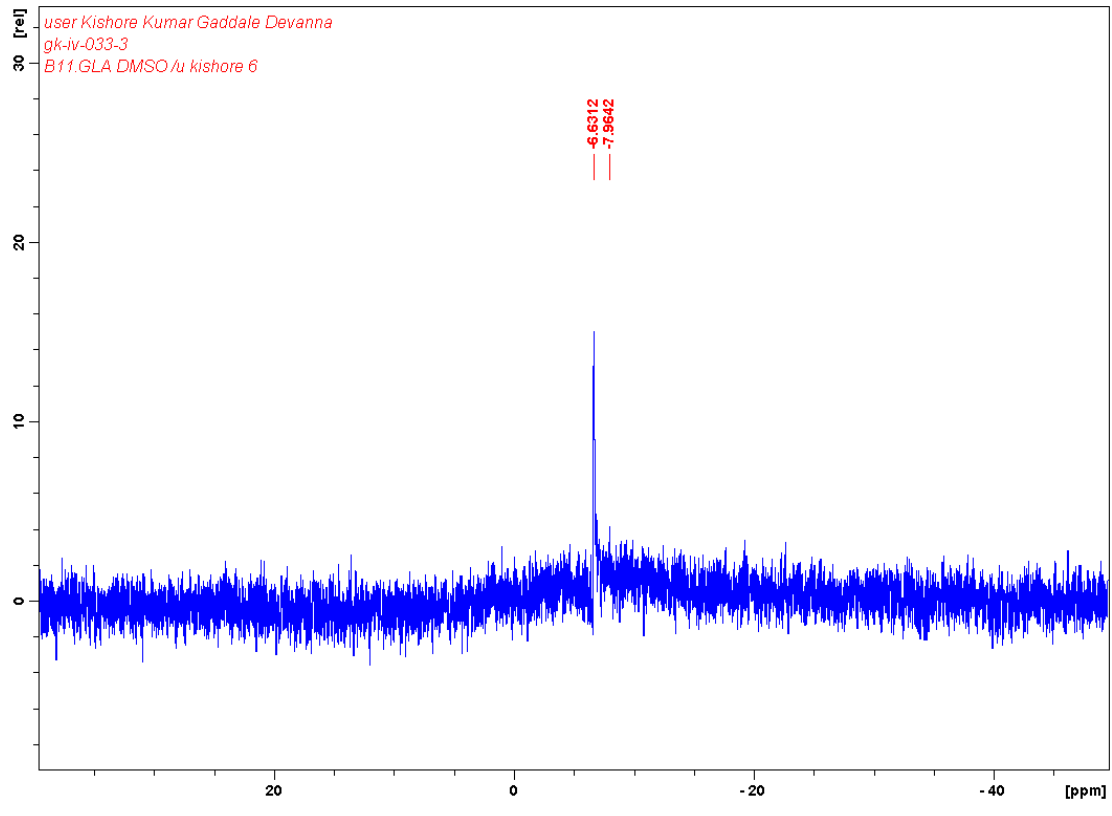

**Sodium (4-{4'-[2''-(6'''-hydroxy-2''',5''',7''',8'''-tetramethylchroman-2''-yl)acetyl]piperazin-1'-ylsulfonyl}phenyl)triphenylborate, TPBE (sodium salt)**

**<sup>1</sup>H NMR spectrum**

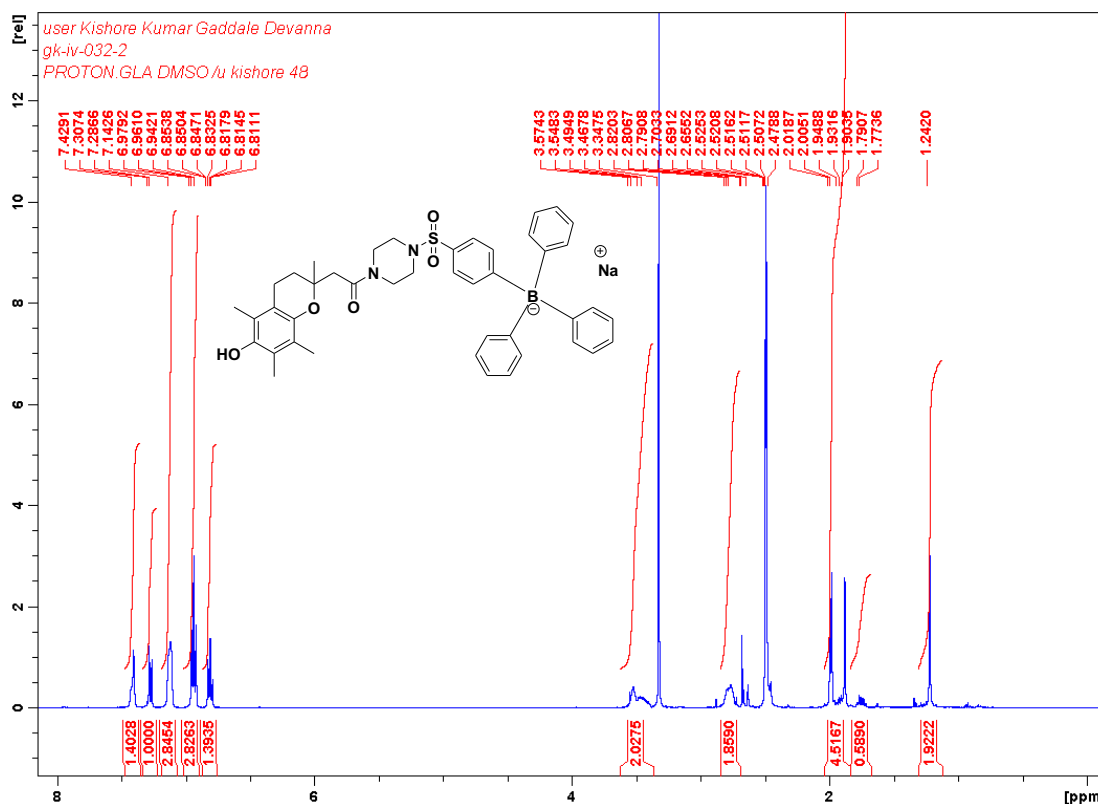

**<sup>13</sup>C NMR spectrum**

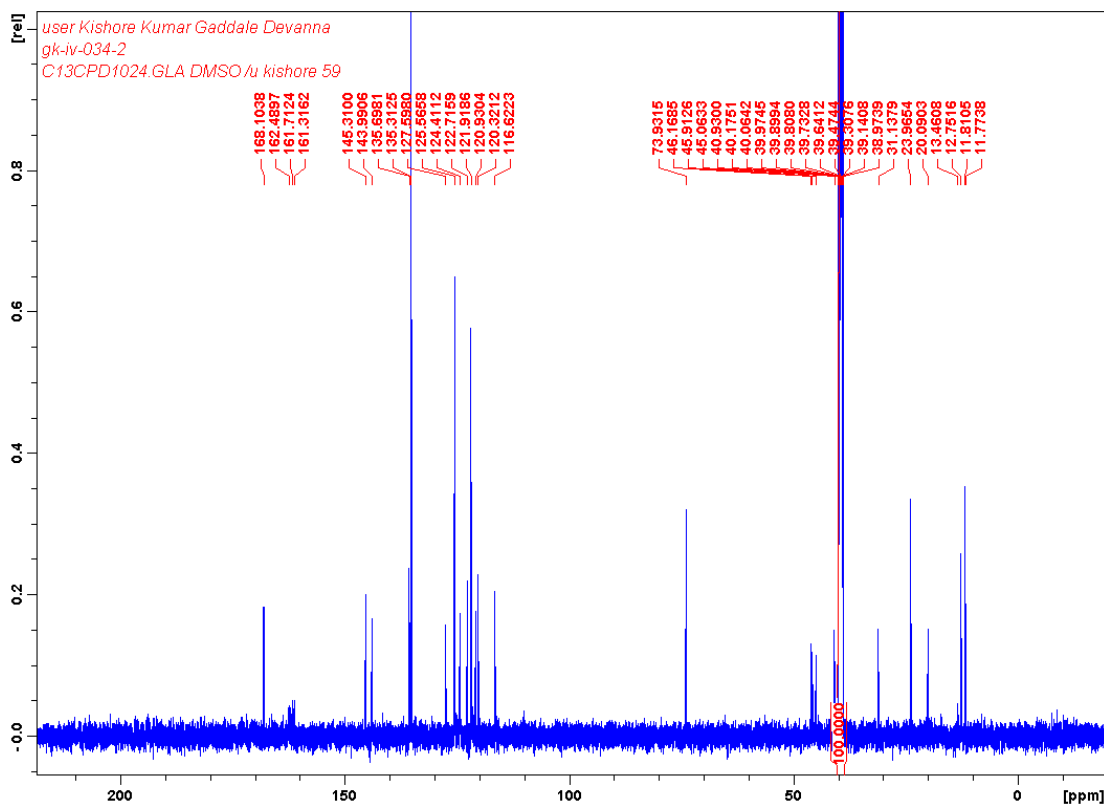

# $^{11}\text{B}$ NMR spectrum

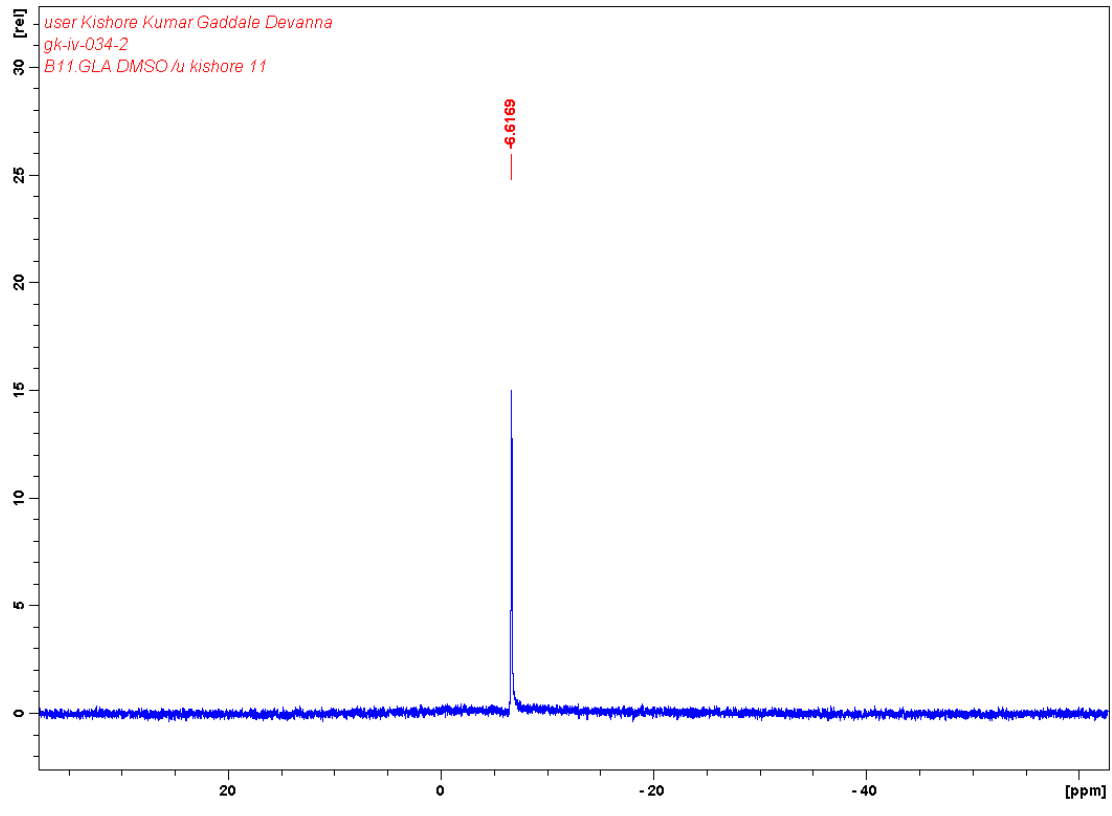

# Sodium [4-(morpholin-1'-ylsulfonyl)phenyl]triphenylborate, TPBM (sodium salt).

## <sup>1</sup>H NMR spectrum

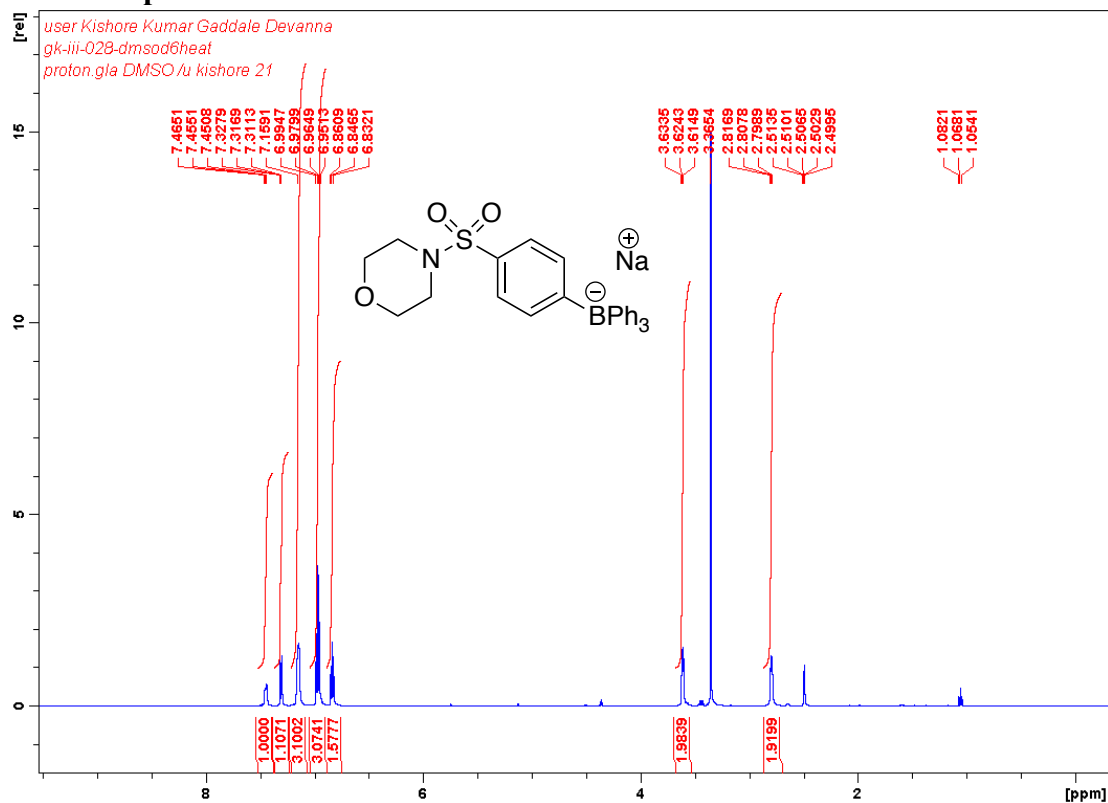

## <sup>13</sup>C NMR spectrum

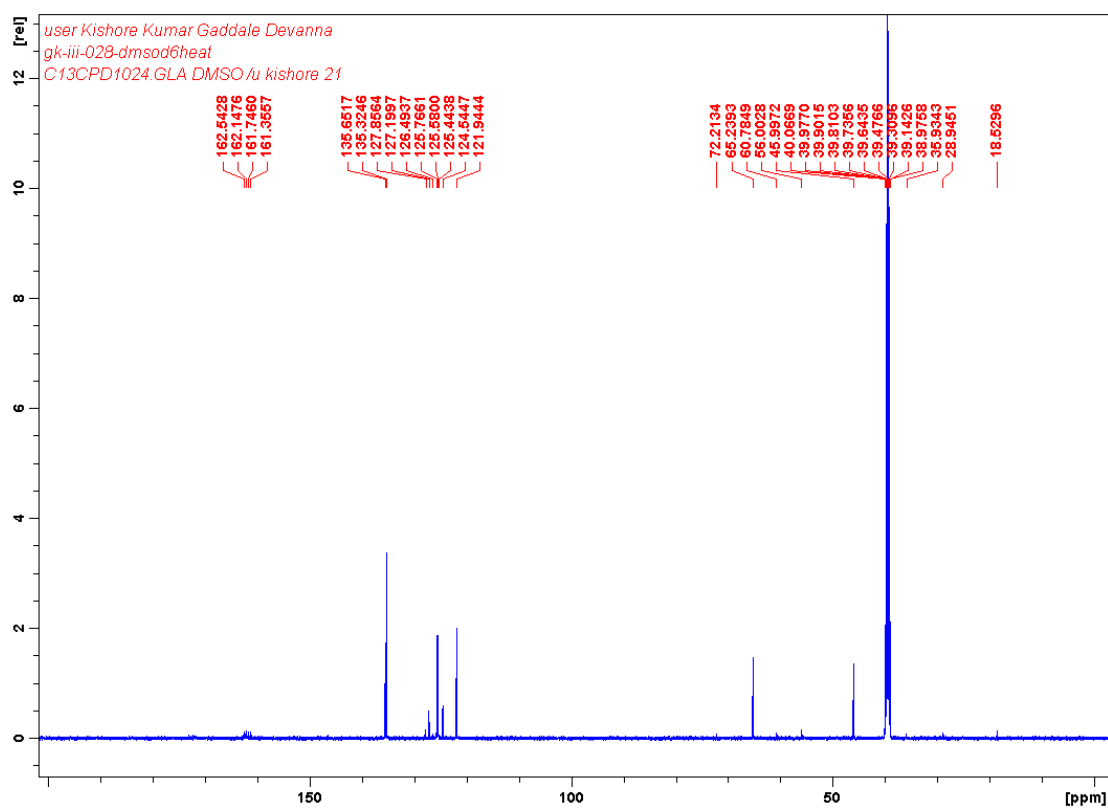

**Sodium (4-{4'-[3''-(4''',4'''-Difluoro-1''',3''',5''',7'''-tetramethyl-4'''-bora-3''',a,4''')a-diaza-s-indacene-8'''-yl]propanoyl]piperazin-1'-ylsulfonyl}phenyl)triphenylborate, TPBBODIPY (sodium salt). <sup>1</sup>H NMR Spectrum**

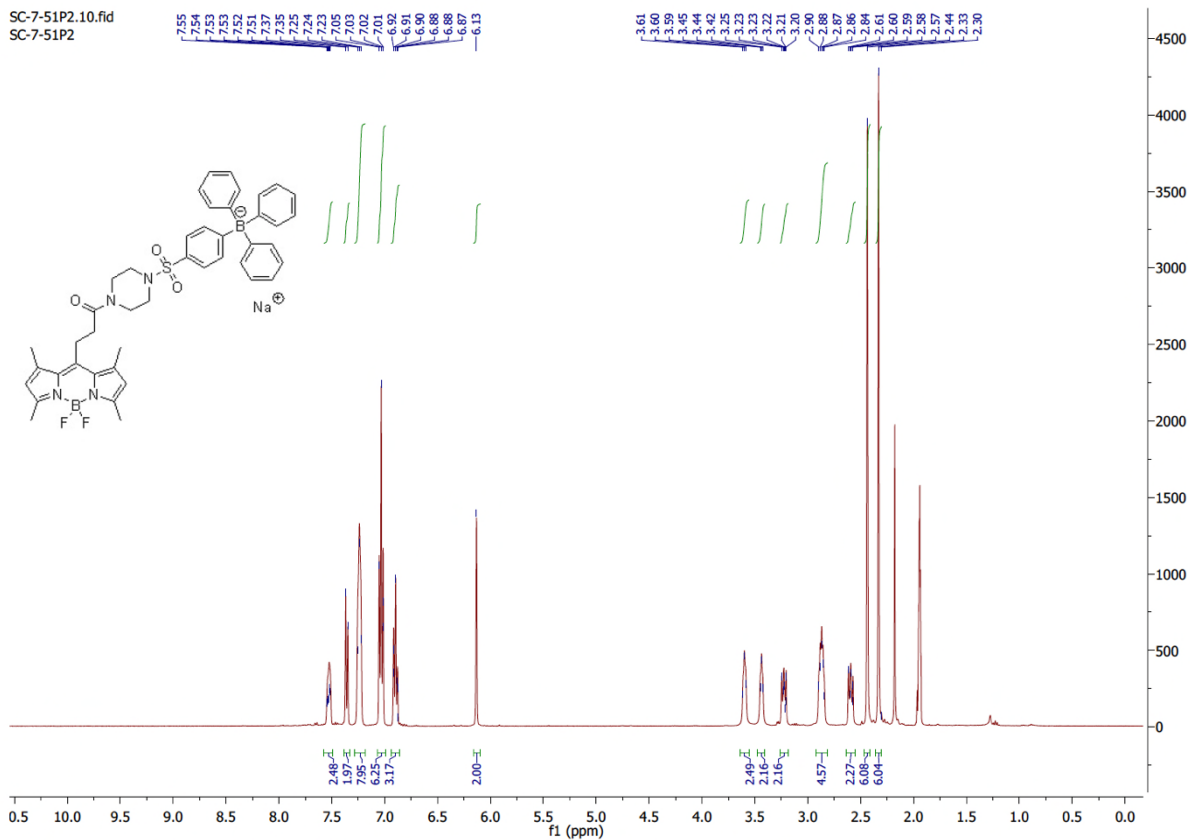

**<sup>13</sup>C NMR Spectrum**

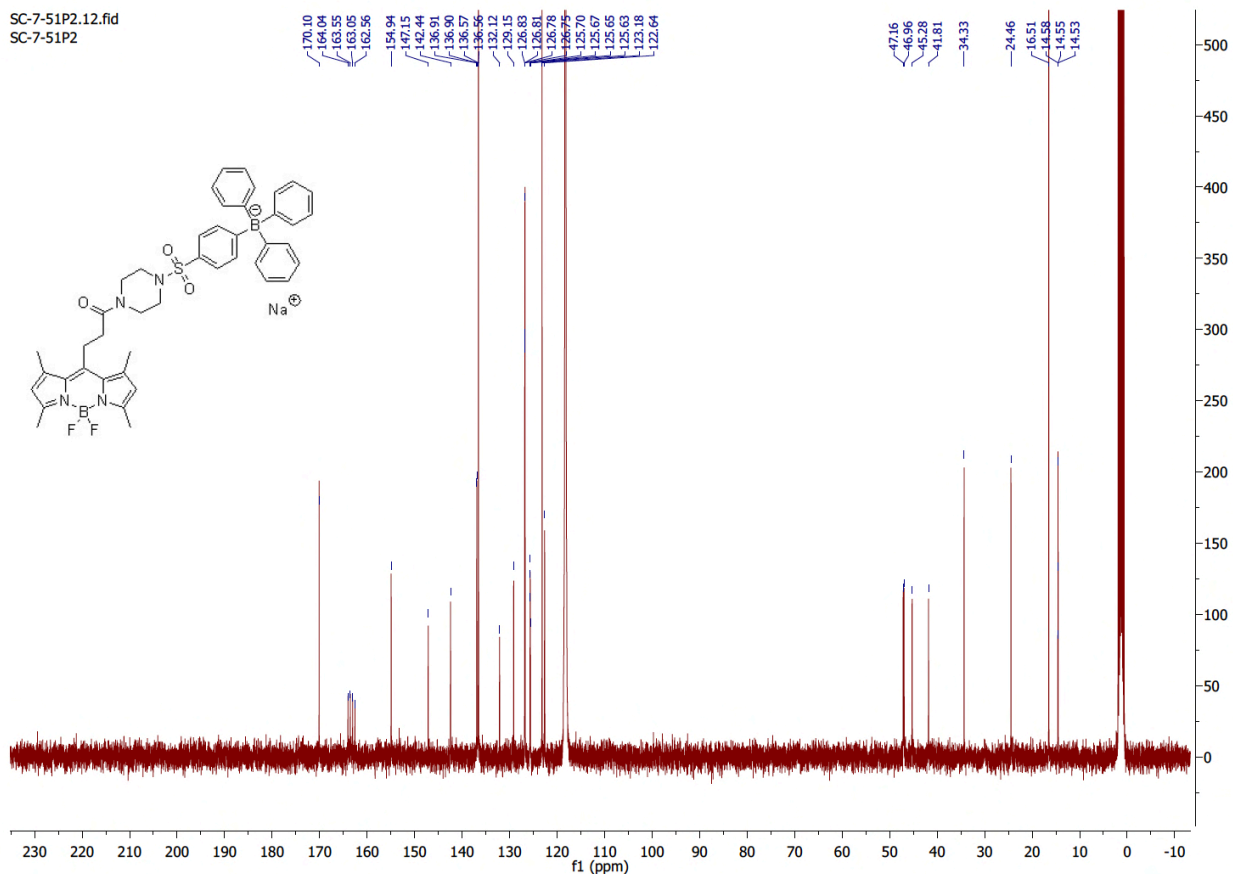

# $^{11}\text{B}$ NMR spectrum

SC-7-51P.15.fid  
SC-7-51P

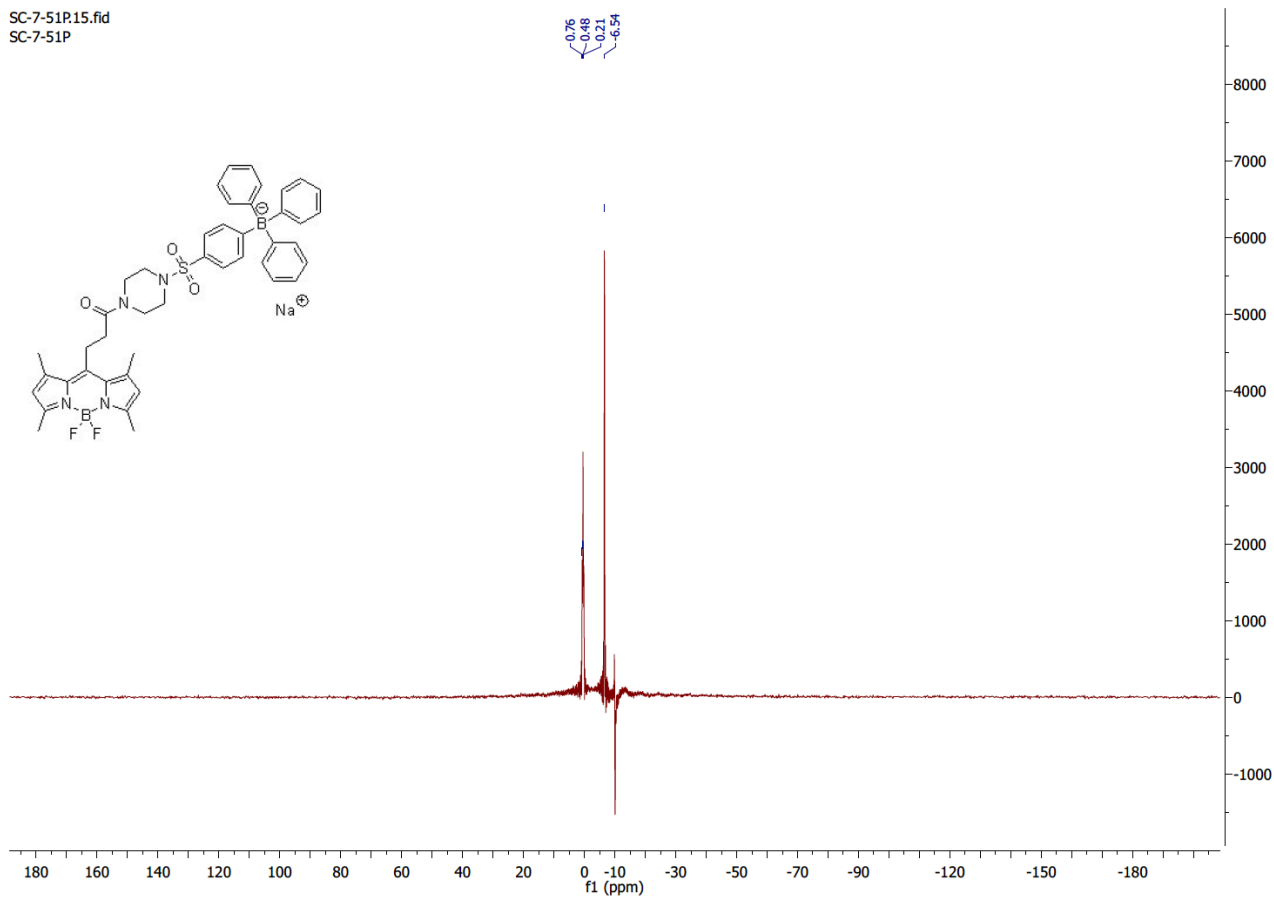



**Sodium (4-{4'-[7''-(diethylamino)coumarin-3''-carbonyl]piperazin-1'-ylsulfonyl}phenyl)triphenylborate, TPBCoumarin (sodium salt).**  
<sup>1</sup>H NMR Spectrum

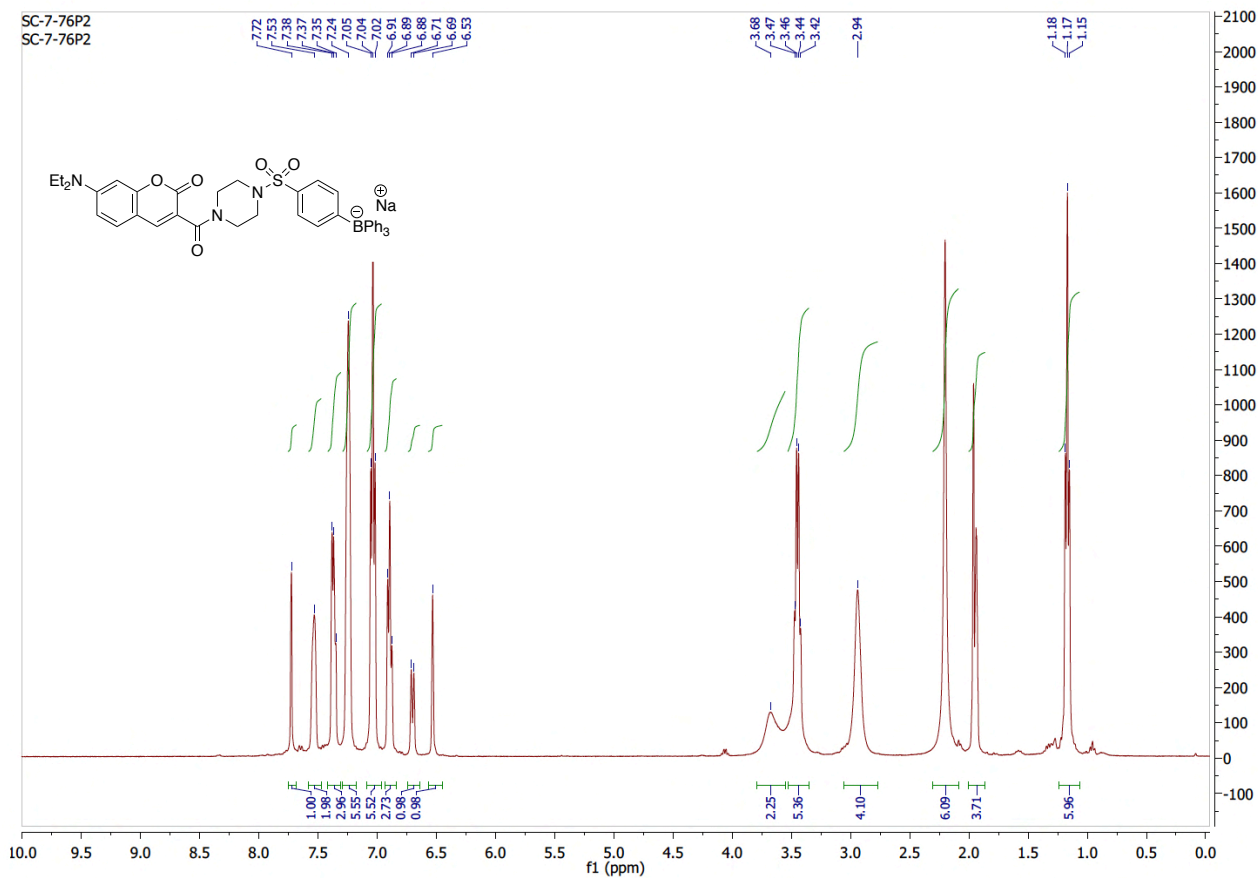

<sup>13</sup>C NMR Spectrum

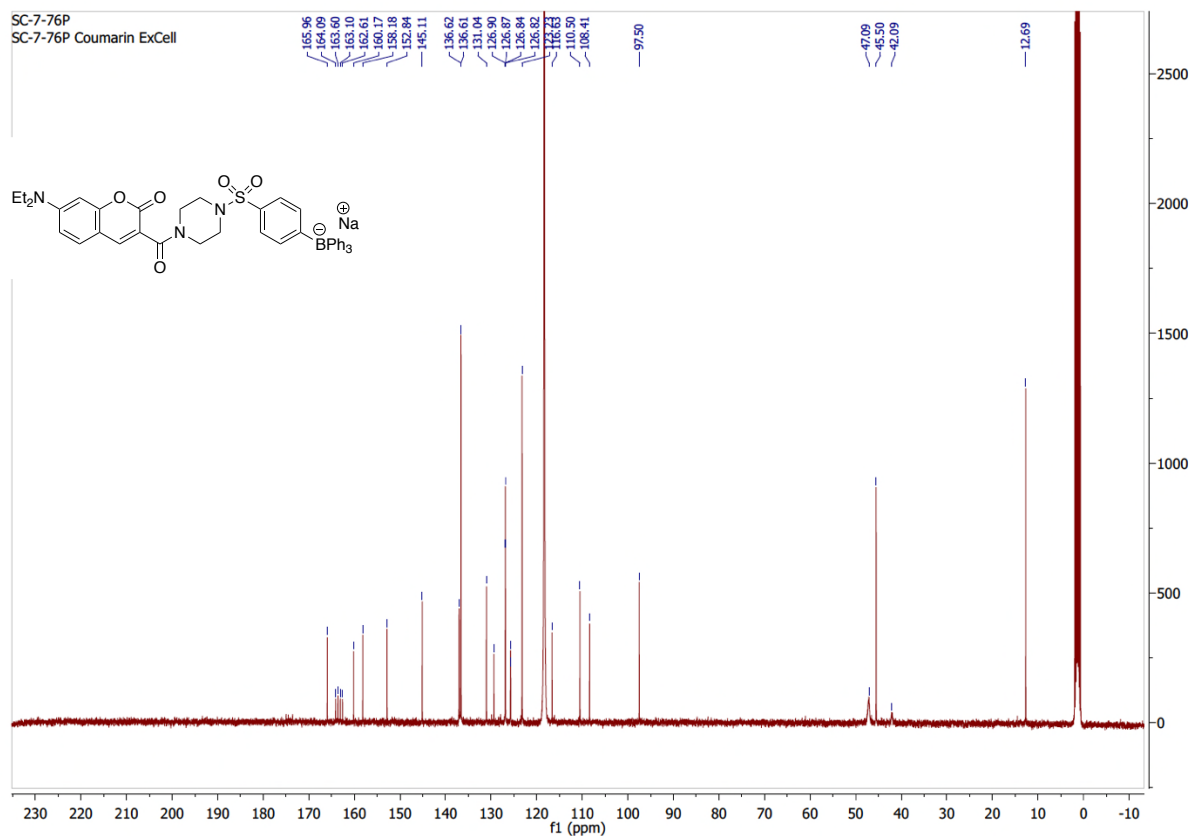

# $^{11}\text{B}$ NMR spectrum

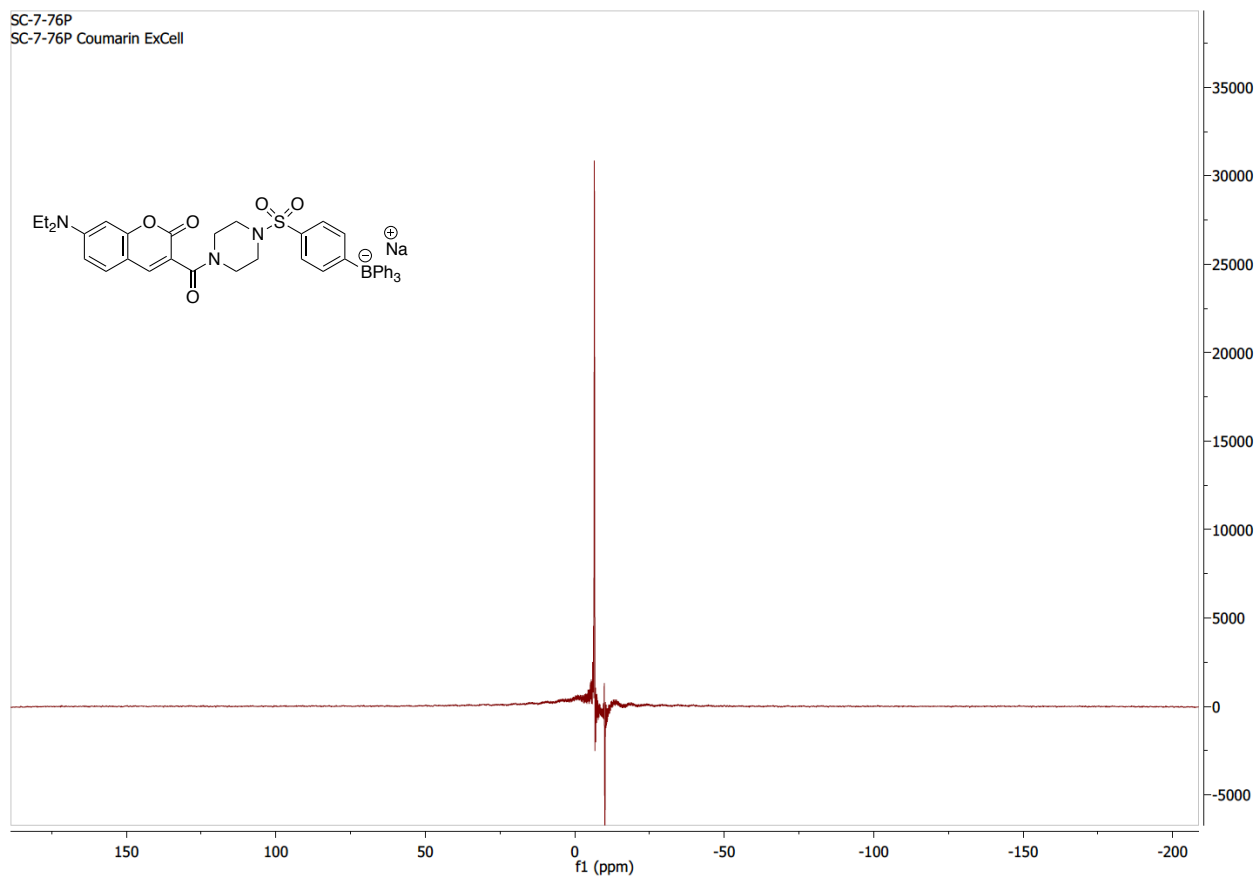

Supplement: d0cc07924c2.pdf [file d0cc07924c2.pdf]
